# Supplementary material
Source: HighWire-hosted journal article supplement (https://jnm.snmjournals.org/highwire/filestream/95048/field_highwire_adjunct_files/0/171413_Supplemental_Data.pdf)
Supplement: 171413_Supplemental_Data.pdf [file 171413_Supplemental_Data.pdf]

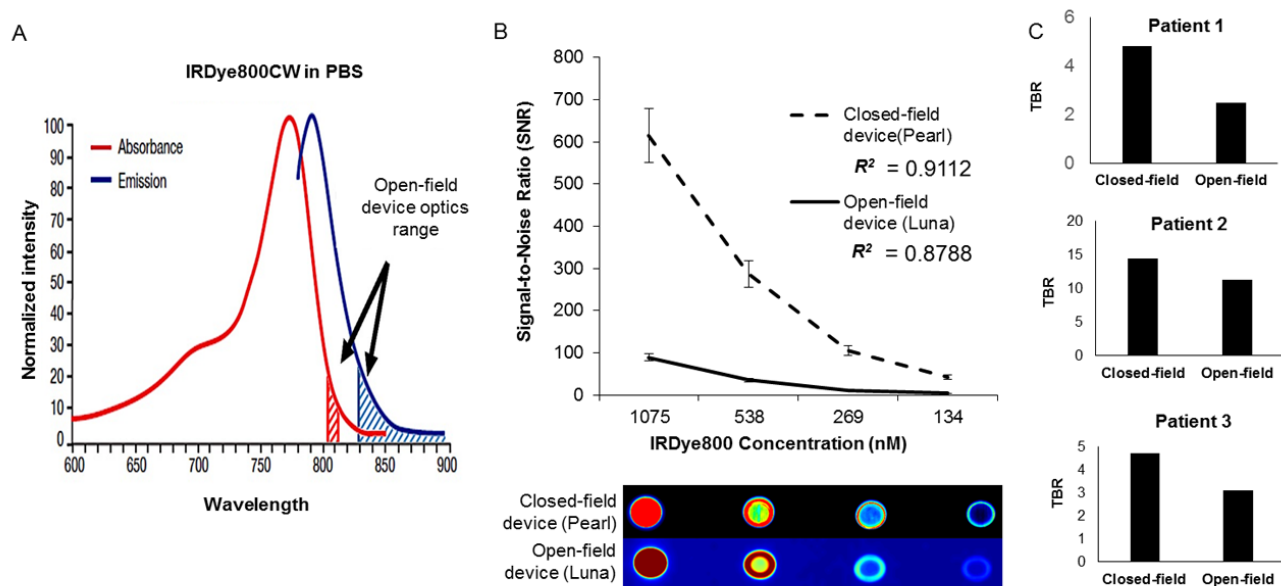

**Supplemental Figure 1. Optical characteristics and standardized performance comparisons.** (A) Optical spectral range of the open-field imaging device. (B) Signal-to-noise ratio for the open-field device and an optimized, closed-field device after imaging the same standard containing 4 decreasing concentrations of IRDye800 (pictured below the graph). (C) Tumor-to-background ratios of the same ex vivo specimen on the open-field and optimized closed-field devices for three representative patients.

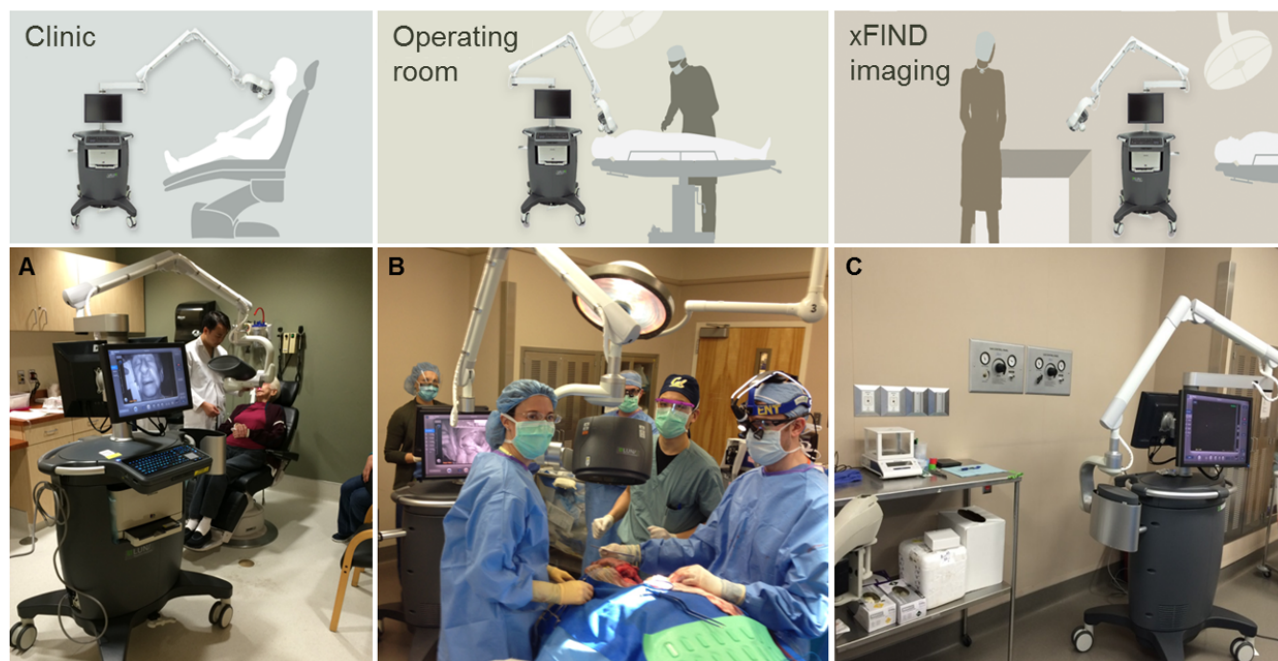

**Supplemental Figure 2. Workflow of the LUNA system repurposed for fluorescence-guided surgery.** Real-time imaging of head and neck cancer patients was performed before surgery in the preoperative clinic (A), in the surgical field (B), and using the ex vivo x-FIND imaging system in the operating room (C).

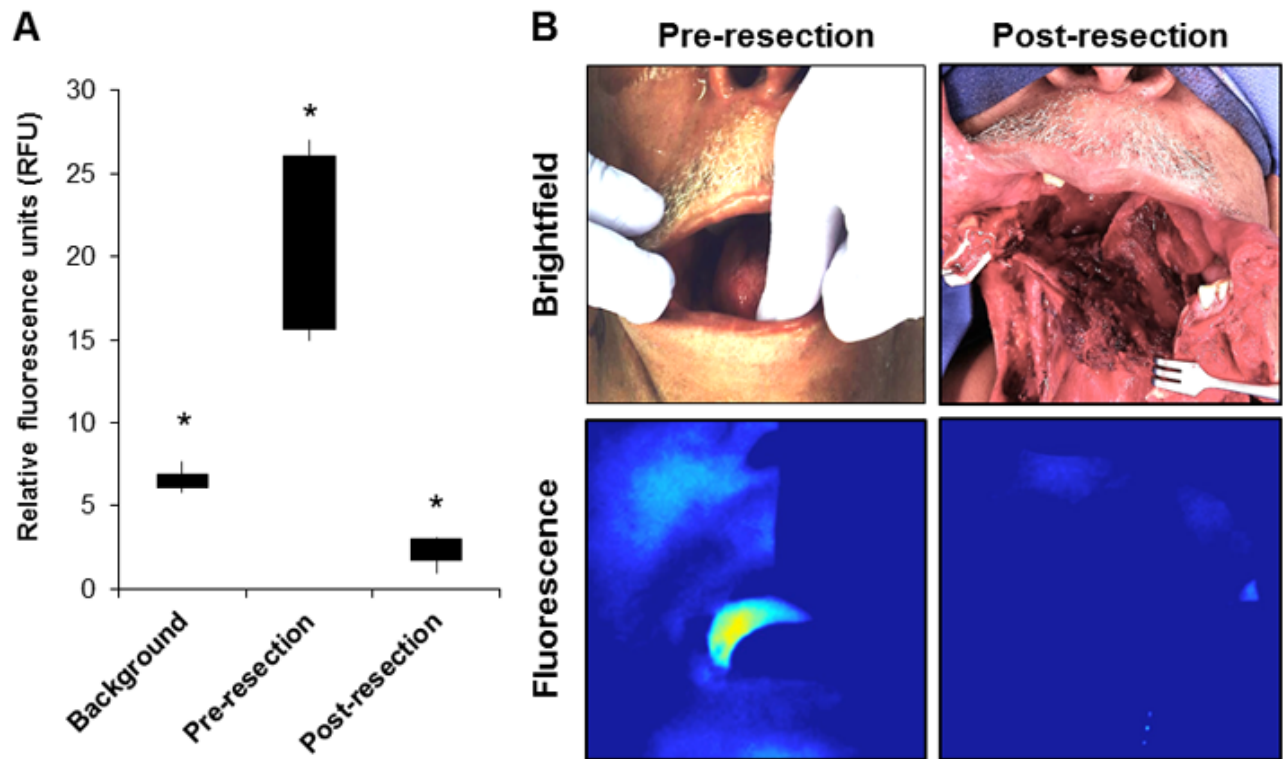

**Supplemental Figure 3. Fluorescence imaging of the postresection wound bed.** (A) Quantification of the background, preresection, and postresection wound bed fluorescence of three representative patients. (B) Bright-field and corresponding fluorescence images of the pre- and postresection wound bed of a patient who underwent total glossectomy.
